# Supplementary material
Source: publisher figshare collection journal article supplement (https://gsapubs.figshare.com/ndownloader/files/23319716)
Supplement: Supplementary file 1 [file 23319716]

## Sheet: Sheet1
Tables DR4. Lu-Hf isotopic compositions of zircons from the granitic batholiths in the WKOB.
Sample	Age (Ma)	（176Yb/177Hf）m	（176Lu/177Hf）m	2σ	（176Hf/177Hf）m	2σ	εHf (t)	fLu/Hf	THfDM2
WK1608
1	513	0.0183127	0.000737743	1.23835e-05	0.282177	1.46577e-05	-9.99985	-0.977779	2114.9
2	513	0.0201875	0.000811349	5.29194e-06	0.282194	1.31109e-05	-9.41873	-0.975562	2078.42
3	513	0.0397001	0.00155086	1.66122e-05	0.282204	1.5118e-05	-9.33856	-0.953287	2073.39
4	513	0.0211648	0.000816131	6.18123e-06	0.282189	1.45322e-05	-9.59351	-0.975418	2089.4
5	513	0.0170444	0.00066797	8.11493e-06	0.282178	1.6155e-05	-9.93068	-0.97988	2110.56
6	513	0.0197922	0.000788469	2.7729e-06	0.282198	1.36964e-05	-9.28249	-0.976251	2069.87
7	513	0.0167018	0.000713232	1.38463e-06	0.282181	1.3532e-05	-9.86088	-0.978517	2106.18
8	513	0.0227869	0.000894663	3.61962e-06	0.282203	1.49264e-05	-9.13471	-0.973052	2060.59
9	513	0.0128294	0.000537493	5.07396e-06	0.282204	1.17523e-05	-8.97448	-0.98381	2050.52
10	513	0.0208363	0.000835832	1.22181e-05	0.282184	1.54024e-05	-9.7781	-0.974824	2100.98
11	513	0.0131108	0.000568394	1.24346e-06	0.282212	1.37019e-05	-8.69891	-0.98288	2033.21
12	513	0.0158999	0.000656202	7.2485e-06	0.282177	1.39385e-05	-9.97621	-0.980235	2113.42
13	513	0.0164901	0.000662739	4.61762e-06	0.282146	1.50906e-05	-11.0799	-0.980038	2182.63
14	513	0.0175746	0.000703161	6.259e-06	0.282204	1.30812e-05	-9.02285	-0.97882	2053.56
15	513	0.0318719	0.00118463	9.41028e-06	0.282154	1.80757e-05	-10.9646	-0.964318	2175.4
16	513	0.0149263	0.000599723	3.37884e-06	0.28219	2.97889e-05	-9.4866	-0.981936	2082.68
17	513	0.0237092	0.000956844	9.305e-06	0.282244	2.34236e-05	-7.70246	-0.971179	1970.55
18	513	0.0199903	0.000806505	7.0978e-06	0.282236	2.72813e-05	-7.937	-0.975708	1985.3
19	513	0.0194577	0.0007866	2.29083e-06	0.28223	2.34589e-05	-8.15684	-0.976307	1999.13
WK1621
1	514	0.011675	0.000557697	5.88035e-06	0.282507	3.50387e-05	1.7597	-0.983202	1372.67
2	514	0.0135618	0.000652593	8.42368e-06	0.282517	2.9413e-05	2.10046	-0.980344	1350.98
3	514	0.0202874	0.000937941	1.0643e-05	0.282516	3.56562e-05	1.96685	-0.971749	1359.49
4	514	0.0224266	0.00103912	6.65572e-06	0.282516	3.31096e-05	1.92905	-0.968701	1361.89
5	514	0.0154475	0.000697337	4.69177e-06	0.282451	3.2137e-05	-0.252319	-0.978996	1500.53
6	514	0.0170937	0.000773231	5.85494e-06	0.282441	3.31908e-05	-0.638498	-0.97671	1525.03
7	514	0.0135827	0.000666592	3.73076e-06	0.282374	4.25051e-05	-2.98251	-0.979922	1673.54
8	514	0.0245065	0.00109904	1.44876e-05	0.282391	3.9926e-05	-2.51947	-0.966896	1644.24
9	514	0.01296	0.000607423	8.93336e-06	0.282493	3.14089e-05	1.23351	-0.981704	1406.13
10	514	0.0162826	0.000765944	3.44682e-06	0.282553	4.17587e-05	3.32922	-0.976929	1272.71
11	514	0.0256382	0.00111933	2.85975e-05	0.282398	3.22903e-05	-2.285	-0.966285	1629.39
12	514	0.0194303	0.000899973	7.22016e-06	0.282517	3.40589e-05	1.99698	-0.972892	1357.57
13	514	0.0175747	0.00081676	1.17225e-05	0.282459	3.48168e-05	-0.0182169	-0.975399	1485.67
14	514	0.0123455	0.000567886	4.65095e-06	0.282434	3.44912e-05	-0.810503	-0.982895	1535.94
15	514	0.0135671	0.000642387	7.05175e-06	0.282473	4.92841e-05	0.511478	-0.980651	1452.02
16	514	0.0207775	0.000970945	8.30195e-06	0.282365	3.00726e-05	-3.41259	-0.970755	1700.74
17	514	0.0150049	0.000674206	4.40628e-06	0.28248	3.16202e-05	0.750525	-0.979693	1436.84
18	514	0.020964	0.000957767	7.88478e-06	0.282376	4.08482e-05	-3.01379	-0.971152	1675.52
19	514	0.0138434	0.000643925	4.21791e-06	0.282502	3.41188e-05	1.55939	-0.980605	1385.41
20	514	0.0135752	0.000616849	6.16429e-06	0.282457	2.59039e-05	-0.0453131	-0.98142	1487.39
WK1618
1	532	0.0230027	0.000968053	4.50864e-06	0.282467	2.22642e-05	0.602721	-0.970842	1460.26
2	532	0.0401089	0.00166557	1.61197e-05	0.282566	2.37924e-05	3.86272	-0.949832	1252.72
3	532	0.0230784	0.000975571	2.41482e-06	0.282492	2.68941e-05	1.4735	-0.970615	1404.9
4	532	0.0266505	0.00114515	8.55577e-06	0.282525	2.44154e-05	2.59107	-0.965507	1333.77
5	532	0.0270809	0.00113234	3.60616e-06	0.28263	2.64754e-05	6.29485	-0.965893	1097.36
6	532	0.0347452	0.00143891	2.46031e-05	0.282516	2.53498e-05	2.17749	-0.956659	1360.11
7	532	0.0264187	0.00111822	1.36026e-05	0.282609	2.7059e-05	5.54945	-0.966319	1145.02
8	532	0.0480952	0.00201715	2.83122e-05	0.282614	2.76541e-05	5.42111	-0.939243	1153.23
9	532	0.0384277	0.00158365	1.60275e-05	0.282565	2.87969e-05	3.83195	-0.9523	1254.68
10	532	0.0267422	0.00112472	7.82386e-06	0.282572	2.12907e-05	4.25794	-0.966123	1227.51
11	532	0.0321859	0.00134163	5.378e-06	0.282524	2.87095e-05	2.46885	-0.959589	1341.56
12	532	0.0253136	0.00108232	7.87129e-06	0.282609	3.78698e-05	5.57392	-0.9674	1143.46
13	532	0.0257439	0.00108297	1.68484e-06	0.282574	2.82513e-05	4.35784	-0.96738	1221.13
14	532	0.0230417	0.000974996	3.58475e-06	0.282531	2.83958e-05	2.84859	-0.970633	1317.37
15	532	0.0345588	0.00143749	4.03724e-05	0.282584	3.0985e-05	4.57213	-0.956702	1207.45
16	532	0.0266744	0.00111219	4.15822e-06	0.282459	3.00679e-05	0.246462	-0.9665	1482.89
17	532	0.0339794	0.00143218	3.07143e-06	0.282571	2.93523e-05	4.11094	-0.956862	1236.89
18	532	0.0280434	0.00118257	2.1411e-05	0.282495	2.69671e-05	1.52238	-0.96438	1401.79
19	532	0.0290054	0.00123201	1.04275e-05	0.28253	2.97584e-05	2.72802	-0.962891	1325.05
WK1635
1	531	0.0417616	0.00165541	9.32344e-06	0.282594	1.70893e-05	4.81512	-0.950138	1191.16
2	531	0.0381737	0.00153312	2.10432e-05	0.282555	2.97983e-05	3.50201	-0.953822	1274.94
3	531	0.0608461	0.00216421	7.67452e-05	0.28264	1.79518e-05	6.27075	-0.934813	1098.12
4	531	0.047747	0.00188399	1.13276e-05	0.282608	1.6598e-05	5.2231	-0.943253	1165.1
5	531	0.0665143	0.00240257	0.000170741	0.282577	1.9772e-05	3.94876	-0.927633	1246.45
6	531	0.0413885	0.00157827	3.15077e-05	0.282606	1.58749e-05	5.28788	-0.952462	1160.96
7	531	0.045193	0.00183253	1.76919e-05	0.282641	1.61236e-05	6.41689	-0.944803	1088.77
8	531	0.0444571	0.0017422	1.0535e-05	0.282562	1.67266e-05	3.64972	-0.947524	1265.53
9	531	0.0423436	0.00169503	4.78144e-05	0.282598	2.36483e-05	4.95736	-0.948945	1182.07
10	531	0.0405822	0.00158968	6.42886e-06	0.282623	1.56956e-05	5.87929	-0.952118	1123.16
11	531	0.0753481	0.00274394	3.72133e-05	0.282577	1.62059e-05	3.83096	-0.917351	1253.97
12	531	0.03495	0.00140676	1.68031e-06	0.28263	1.66576e-05	6.17044	-0.957628	1104.54
13	531	0.0363599	0.00144885	5.99875e-06	0.28262	1.46924e-05	5.83047	-0.95636	1126.28
14	531	0.0439017	0.00172528	1.19733e-05	0.282582	1.74314e-05	4.35857	-0.948034	1220.3
15	531	0.0560177	0.00220219	2.36267e-05	0.282572	1.51468e-05	3.84849	-0.933669	1252.85
16	531	0.0597564	0.00231583	1.48913e-05	0.282583	1.79037e-05	4.1939	-0.930246	1230.81
Notes:
m: measured value
